# Supplementary material for: Lignans intake and enterolactone concentration and prognosis of breast cancer: a systematic review and meta-analysis
Source: PubMed Central journal article supplement (PMC8040718; doi:10.7150/jca.55477), 2021-03-10

**Table 1 Characteristics of literature that duplicate the data extracted in the review**

| Study, Publication Year(Ref) | Country                  | N <sub>total</sub> (all deaths/ due to BC) | Follow-up Time(median) | Exposure                           | Menopausal status (Nsubgroup/deaths) | Enterolactone categories                       | All-cause mortality HR(95%CI)                   | Cancer-specific mortality HR(95%CI) | recurrence | Adjustment factors                                                                                                                    |
|------------------------------|--------------------------|--------------------------------------------|------------------------|------------------------------------|--------------------------------------|------------------------------------------------|-------------------------------------------------|-------------------------------------|------------|---------------------------------------------------------------------------------------------------------------------------------------|
| Buck 2011a MARIE             | Germany (RNK), 2002–2005 | 1,140 (162/124)                            | 6.1 years              | Serum enterolactone, postdiagnosis | postmenop. (all)                     | Q4 ( $\geq 42.3$ ) vs. Q1 ( $\leq 7.8$ nmol/L) | per 10 nmol/L 0.58 (0.34–0.99) 0.94 (0.88–1.00) | -                                   |            | TNM, grade, ER/PR, mode of detection, diabetes, use of menopausal hormone therapy, BMI, physical activity (strata: age, study region) |

|                        |                               |                        |           |                                                     |                     |                                                            |                         |                                                    |  |                                                                                                                                                                                    |
|------------------------|-------------------------------|------------------------|-----------|-----------------------------------------------------|---------------------|------------------------------------------------------------|-------------------------|----------------------------------------------------|--|------------------------------------------------------------------------------------------------------------------------------------------------------------------------------------|
| Buck<br>2011b<br>MARIE | German<br>y,<br>2001–2<br>005 | 2,653<br>(321/23<br>5) | 6.4 years | Estimated<br>enterolact<br>one,<br>prediagno<br>sis | postmenop.<br>(all) | Q5<br>(median<br>502.0) vs.<br>Q1<br>(median<br>146.0ug/d) | 0.60<br>(0.40–0.<br>89) | 0.69<br>(0.43–1.10<br>)                            |  | TNM,<br>grade,<br>ER/PR,<br>mode of<br>detectio<br>n,<br>diabetes<br>, use of<br>menopa<br>usal<br>hormone<br>therapy,<br>study<br>region,<br>energy<br>intake<br>(strata:<br>age) |
| Olsen<br>2012          | Denmar<br>k,<br>1993–1<br>997 | 424<br>(111/80)        | 10 years  | Plasma<br>enterolact<br>one,<br>prediagno<br>sis    | postmenop.<br>(all) | >vs. ≤ 20.5<br>nmol/L(me<br>dian)<br>per 20<br>nmol/L      | 0.47<br>(0.32–0.<br>68) | 0.56<br>(0.36–0.87<br>)<br>0.82<br>(0.70–0.<br>96) |  | grade,<br>alcohol<br>intake,<br>menopa<br>usal<br>hormone<br>therapy                                                                                                               |

**Table 2 Supplementary characteristics of studies**

| <b>Study,<br/>Author,<br/>Publication Year (Ref)</b> | <b>Adjustment factors</b>                                                          |
|------------------------------------------------------|------------------------------------------------------------------------------------|
| LIBCSP<br>Fink<br>2007[12]                           | age, energy intake                                                                 |
| WEB<br>McCann<br>2010[13]                            | age, education, race, stage at diagnosis, body mass index, and total energy intake |

|                           |                                                                                                                                                                                                                                                                                                                                              |
|---------------------------|----------------------------------------------------------------------------------------------------------------------------------------------------------------------------------------------------------------------------------------------------------------------------------------------------------------------------------------------|
| Guglielmini<br>2012[14]   | menopausal status, tumor size, nodal status,<br>adjuvant chemotherapy and adjuvant Tamoxifen                                                                                                                                                                                                                                                 |
| MARIE<br>Seibold 2014[15] | TNM, grade, ER/PR, mode of detection, physical<br>activity, time between blood draw and enterolact one<br>measurement, menopausal hormone therapy, BMI,<br>smoking, radiotherapy (strata: age, study region)                                                                                                                                 |
| EPIC Cecilie 2015[16]     | ER receptor status, cancer stage and grading of<br>tumor. Further, strata are made for country and<br>5-year age group                                                                                                                                                                                                                       |
| Cecilie 2017[17]          | smoking status at baseline (never, former, current),<br>smoking intensity (packyears), schooling (short≤7<br>years, medium 8-10 years, long≥11 years), BMI at<br>baseline (continuous, kg/m <sup>2</sup> ), physical activity<br>measure at baseline (participate in sports, yes/no)<br>and hormone use at baseline (never, former, current) |

---

#### Newcastle-Ottawa Scale (NOS)

| Author              | Type of Study                        | Selection | Comparability | Outcome  |
|---------------------|--------------------------------------|-----------|---------------|----------|
| Guglielmini<br>2012 | retrospective cohort study           | 3         | 2             | 3        |
| Cecilie 2015        | Prospective multicenter cohort study | 3         | 2             | 3        |
| Cecilie 2017        | Cancer and Health cohort             | 3         | 2             | 2        |
|                     |                                      | Selection | Comparability | Exposure |
| Fink2007            | case-control study                   | 4         | 2             | 2        |
| McCann2010          | case-control study                   | 3         | 2             | 2        |

**Search strategy****Embase**

#1 mortality OR mortality:ti,ab,kw OR 'mortality'/exp OR survival OR survival:ti,ab,kw OR 'survival'/exp OR prognosis OR prognosis:ti,ab,kw OR 'prognosis'/exp OR (disease AND progression) OR 'disease progression':ti,ab,kw OR 'disease progression'/exp OR relapse OR relapse:ti,ab,kw OR 'relapse'/exp OR 'recurrent disease' OR 'recurrent disease':ti,ab,kw OR 'recurrent disease'/exp OR (treatment AND outcome) OR 'treatment outcome':ti,ab,kw OR 'treatment outcome'/exp OR death OR death:ti,ab,kw OR 'death'/exp

#2 enterolactone OR enterolactone:ti,ab,kw OR 'enterolactone'/exp OR lignan OR lignan:ti,ab,kw OR 'lignan'/exp

#3 'breast tumor' OR 'breast tumor':ti,ab,kw OR 'breast tumor'/exp

#4 #1 AND #2 AND #3

**PubMed and Cochrane library**

#1 (((((enterolactone[Title/Abstract]) OR (enterolactone)) OR (enterolactone[MeSH Terms])) OR (Lignans[MeSH Terms])) OR (Lignans)) OR (Lignans[Title/Abstract])

#2 (((((Breast Neoplasm[Title/Abstract]) OR (Breast Neoplasm)) OR (Breast Neoplasm[MeSH Terms])) OR (Mammary Cancers[MeSH Terms])) OR (Mammary Cancers)) OR (Mammary Cancers[Title/Abstract])

#3 (((((((((((((((((((mortality[MeSH Terms]) OR (mortality)) OR (mortality[Title/Abstract])) OR (survival[Title/Abstract])) OR (survival[MeSH Terms])) OR (survival)) OR (prognosis)) OR (prognosis[MeSH Terms])) OR (prognosis[Title/Abstract])) OR (disease progression[Title/Abstract])) OR (disease progression)) OR (disease progression[MeSH Terms])) OR (relapse[MeSH Terms])) OR (relapse)) OR (relapse[Title/Abstract])) OR (recurrence[Title/Abstract])) OR (recurrence)) OR (treatment outcome)) OR (treatment outcome[Title/Abstract])) OR (treatment outcome[MeSH Terms])) OR (death[MeSH Terms])) OR (death)) OR (death[Title/Abstract])

#4 #1 and #2 and #3

**Web of Science**

#1 Topic:(Breast Neoplasm) OR Title:(Breast Neoplasm) OR Topic:(Mammary Cancers) OR Title:(Mammary Cancers)

#2 Topic:(enterolactone) OR Title:(enterolactone) OR Topic:(Lignans) OR Title:(Lignans)

#3 Topic:(mortality) OR Title:(mortality) OR Topic:(survival) OR Title:(survival) OR Topic:(prognosis) OR Title:(prognosis) OR Topic:(disease progression) OR Title:(disease progression) OR Topic:(relapse) OR Title:(relapse) OR Topic:(recurrence) OR Title:(recurrence) OR Topic:(treatment outcome) OR Title:(treatment outcome) OR Topic:(death) OR Title:(death)

#4 #1 and #2 and #3

**Figure 1 postmenopausal enterolactone in vivo and breast tumor recurrence**

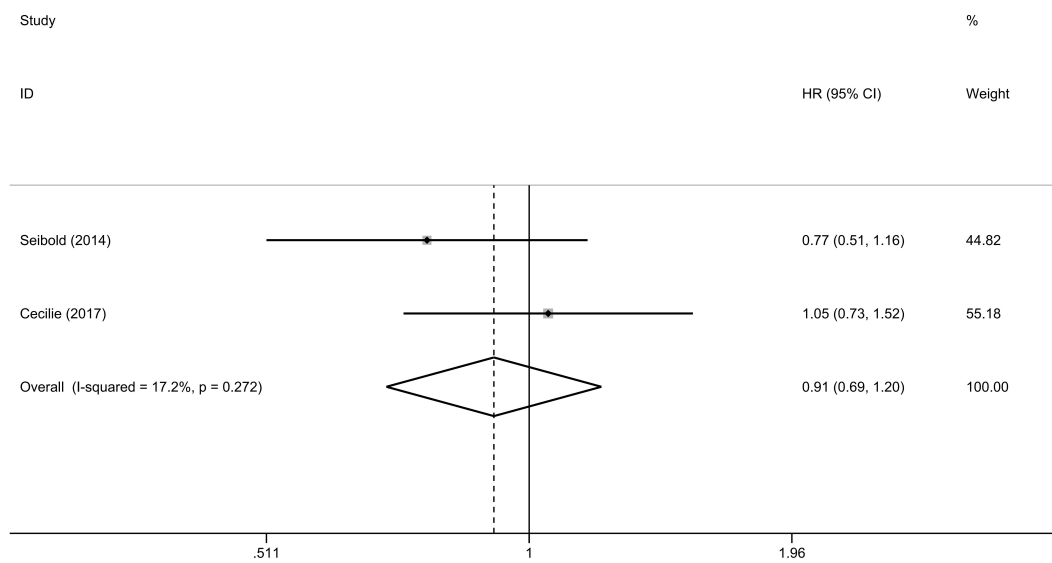

**Postmenopausal lignans intake or enterolactone in vivo and risk of all- cause and breast cancer-specific mortality(upper quartile vs. minimum). (a) risk of all- cause mortality, (b) risk of breast cancer-specific mortality**

**(a)**

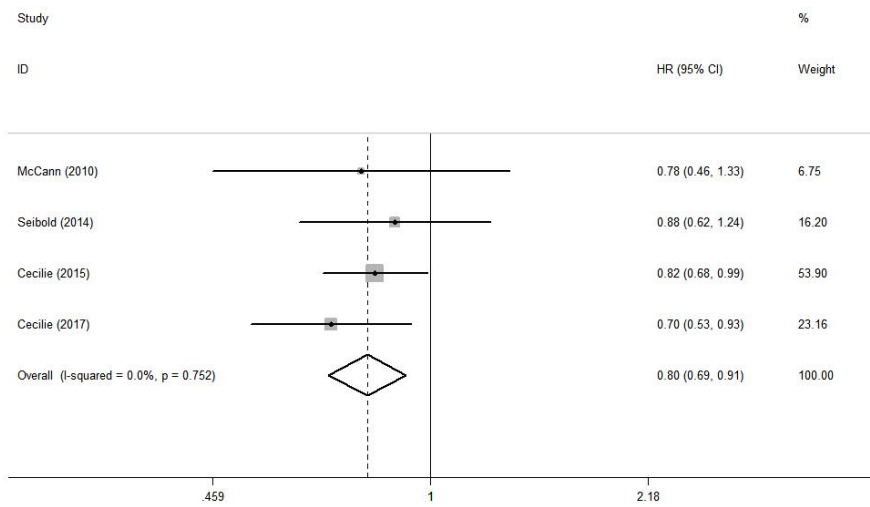

**(b)**

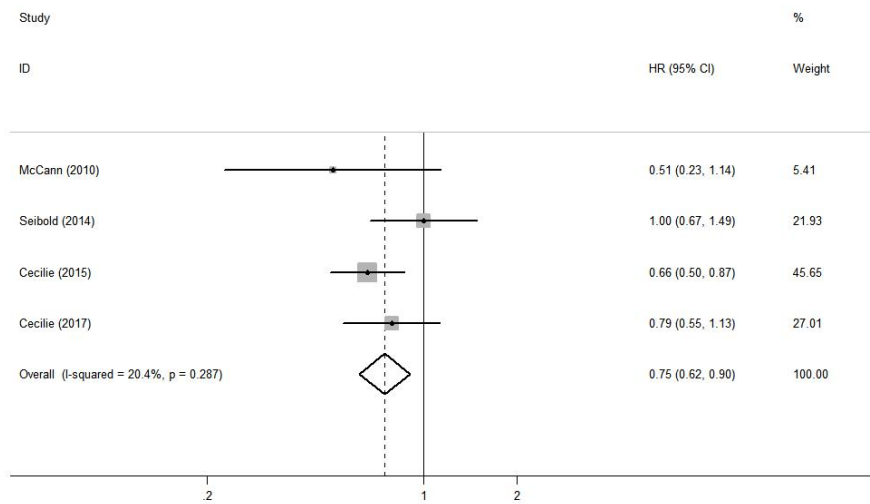

**Postmenopausal lignans intake or enterolactone in vivo and risk of all- cause and breast cancer-specific mortality(lower quartile vs. minimum). (a) risk of all- cause mortality, (b) risk of breast cancer-specific mortality**

**(a)**

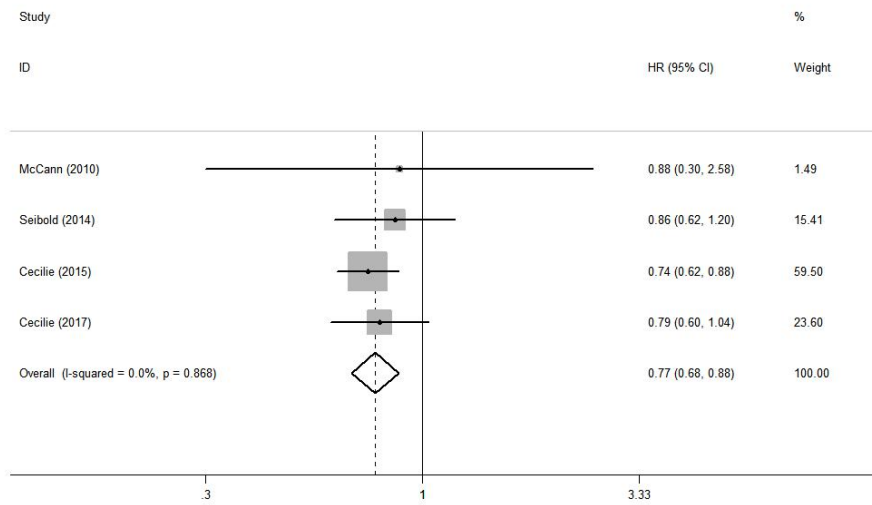

**(b)**

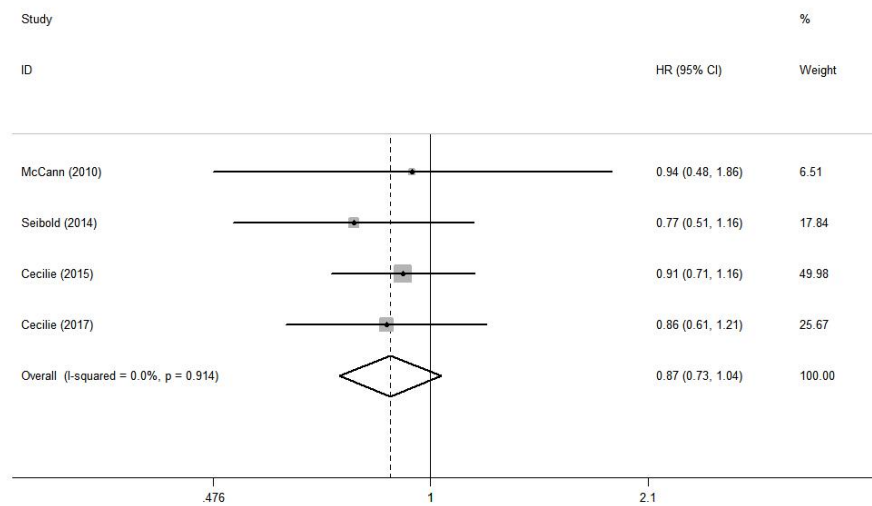

**Premenopausal lignans intake or enterolactone in vivo and risk of all- cause and breast cancer-specific mortality(upper quartile vs. minimum). (a) risk of all- cause mortality, (b) risk of breast cancer-specific mortality**

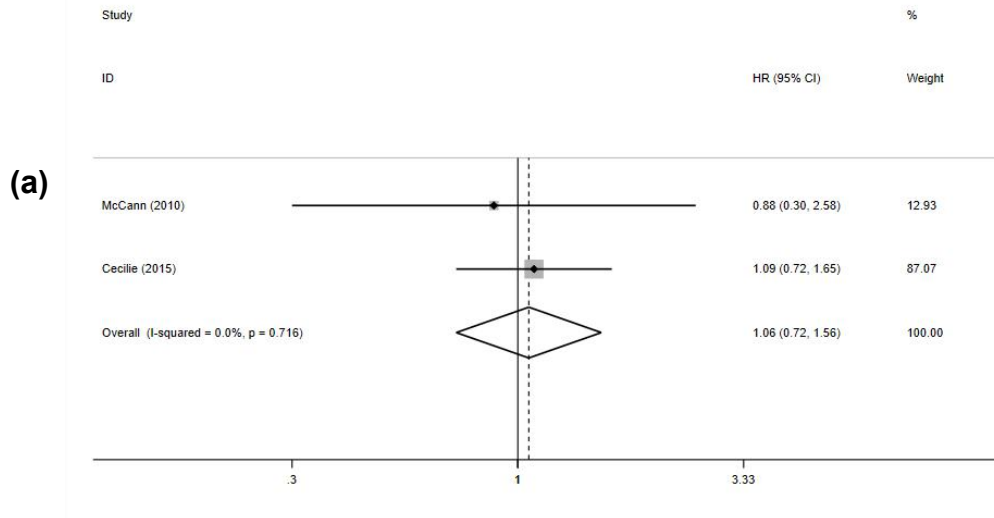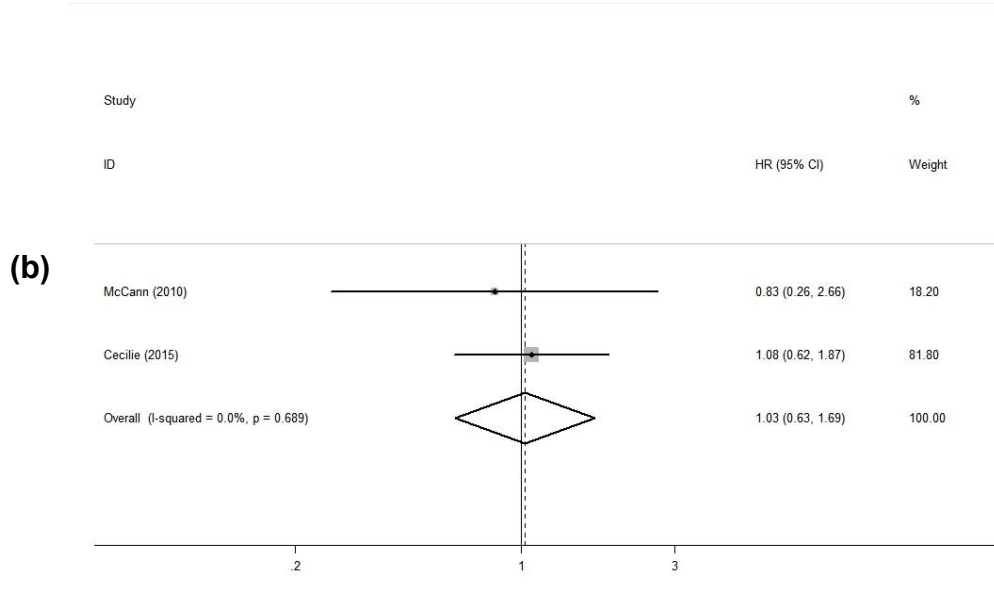



**Premenopausal lignans intake or enterolactone in vivo and risk of all- cause and breast cancer-specific mortality(lower quartile vs. minimum). (a) risk of all- cause mortality, (b) risk of breast cancer-specific mortality**

**(a)**

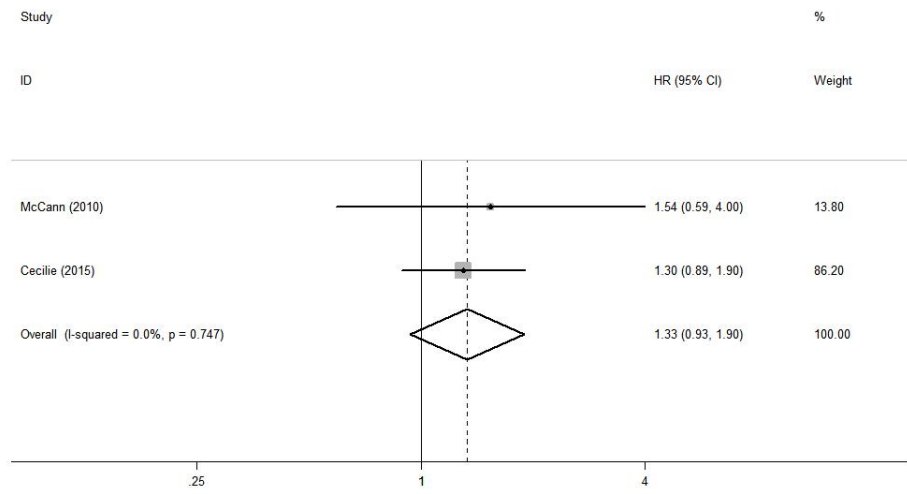

**(b)**

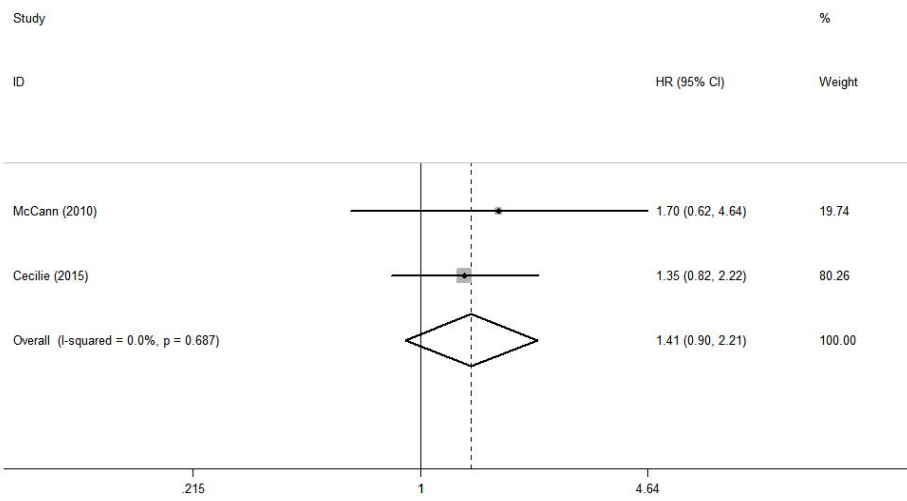

Supplement: jcav12p2787s1.pdf [file jcav12p2787s1.pdf]
